# Supplementary material
Source: PubMed Central journal article supplement (PMC5217786)
Supplement: NIHMS837214-supplement-Supplementary_Material.pdf [file NIHMS837214-supplement-Supplementary_Material.pdf]

## MCMC DETAILS AND ADDITIONAL SIMULATION RESULTS

BY LUKE B. SMITH\*, MONTSERRAT FUENTES\*  
PENNY GORDON-LARSEN\*,<sup>†</sup> AND BRIAN J. REICH\*

*North Carolina State University and  
University of North Carolina at Chapel Hill*

### SUPPLEMENTARY MATERIAL

#### 1. MCMC Details.

1.1. *Quantile Parameters.* All prior parameters are independent across basis functions and predictors. Polynomial parameters are also independent. That is, the intercept effect over time is independent of slope effect across time. Let  $\theta_{dmp}^*$  be the vector of length  $H = 2$  corresponding to the regression coefficients for SBP and DBP for the  $d^{\text{th}}$  polynomial term,  $m^{\text{th}}$  basis function and  $p^{\text{th}}$  predictor. In our model  $\theta_{dmp}^* \sim N(\mu_{dmp}, \iota_{dmp}^2)$ , where  $\iota_{dmp}^2$  is a precision. Below we suppress the subscripts for  $d$ ,  $m$ , and  $p$ . We sample from the posterior distribution for  $\theta_{dmp}^*$  using random walk Metropolis, as the posterior distribution does not have a closed form. In the burn in period posterior variances are tuned to have a 30-40% acceptance ratio.

We assign  $\mu$  a Gaussian prior with mean  $\mu_0$  and precision  $\iota_0^2$ . Conditional on the other parameters the posterior distribution of  $\mu$  is of the form

$$\begin{aligned} [\mu|rest] &\propto \exp\left\{-0.5\iota^2[\boldsymbol{\theta}^* - \mathbf{1}\mu]'[\boldsymbol{\theta}^* - \mathbf{1}\mu]\right\} \exp\left\{-0.5(\iota_0^2)[\mu - \mu_0]^2\right\} \\ &\propto \exp\left\{-0.5[\mu^2(\iota^2\mathbf{1}'\mathbf{1} + \iota_0^2) - 2\mu(\iota^2\mathbf{1}'\boldsymbol{\theta} + \iota_0^2\mu_0)]\right\} \\ &= \exp\left\{-0.5[\mu'\Omega\mu - 2\mu'\omega]\right\} \\ &= \exp\left\{-0.5[\mu'\Omega\mu - 2\mu'\Omega(\Omega^{-1}\omega)]\right\} \end{aligned}$$

which is the kernel of a normal random variable with mean  $\Omega^{-1}\omega$  and variance  $\Omega^{-1}$  where  $\Omega = H\iota^2 + \iota_0^2$  and  $\omega = \iota^2\mathbf{1}'\boldsymbol{\theta} + \iota_0^2\mu_0$ .

---

\*The authors are grateful for support from NSF grant DMS-1107046, NIH grant SR01ES014843, as well as NHLBI (R01-HL108427).

<sup>†</sup>The China Health and Nutrition Survey is funded by NICHD (R01-HD30880), although no direct support was received from grant for this analysis. We also are grateful to the Carolina Population Center (R24 HD050924) for general support.

We assign  $\iota^2$  a gamma( $a, b$ ) prior. Let  $\mathbf{x} = \boldsymbol{\theta}^* - \mathbf{1}\mu$ . Conditional on the other parameters the posterior distribution of  $\iota^2$  is of the form

$$\begin{aligned} [\iota^2|rest] &\propto \iota^{H/2} \exp\{-0.5\iota^2 \mathbf{x}'\mathbf{x}\} (\iota^2)^{(a-1)} \exp\{-\iota^2/b\} \\ &\propto (\iota^2)^{(H/2+a-1)} \exp\{-\iota^2(0.5\mathbf{x}'\mathbf{x} + 1/b)\} \\ &= (\iota^2)^{(H/2+a-1)} \exp\{-\iota^2((0.5b\mathbf{x}'\mathbf{x} + 1)/b)\} \end{aligned}$$

which is the kernel of a gamma random variable with shape  $H/2 + a$  and scale  $(2b/(b\mathbf{x}'\mathbf{x} + 2))$ .

1.2. *Copula Parameters.* For MCMC we model  $\Phi^{-1}(\mathbf{U}_i) = \mathbf{W}_i = \mathbf{D}_i [\mathbf{Z}_i\boldsymbol{\gamma}_i + \boldsymbol{\eta}_i + \mathbf{E}_i]$ , where  $\boldsymbol{\eta}_i \sim \mathbf{N}(0, \boldsymbol{\Xi}(\alpha) \otimes \boldsymbol{\Lambda})$ . The regression coefficients  $\boldsymbol{\gamma}_i$  have posterior

$$\begin{aligned} [\boldsymbol{\gamma}_i|rest] &\propto \exp\left\{-0.5[\mathbf{W}_i - \mathbf{D}_i(\mathbf{Z}_i\boldsymbol{\gamma}_i + \boldsymbol{\eta}_i)]' \mathbf{D}_i^{-2} [\mathbf{W}_i - \mathbf{D}_i(\mathbf{Z}_i\boldsymbol{\gamma}_i + \boldsymbol{\eta}_i)]\right\} \exp\left\{-0.5\boldsymbol{\gamma}_i' \boldsymbol{\Delta}^{-1} \boldsymbol{\gamma}_i\right\} \\ &\propto \exp\left\{-0.5\boldsymbol{\gamma}_i' \left(\mathbf{Z}_i' \mathbf{D}_i \mathbf{D}_i^{-1} \mathbf{D}_i^{-1} \mathbf{D}_i \mathbf{Z}_i + \boldsymbol{\Delta}^{-1}\right) \boldsymbol{\gamma}_i + \boldsymbol{\gamma}_i \mathbf{Z}_i' \mathbf{D}_i \mathbf{D}_i^{-2} (\mathbf{W}_i - \mathbf{D}_i \boldsymbol{\eta}_i)\right\} \\ &= \exp\left\{-0.5\boldsymbol{\gamma}_i' \left(\mathbf{Z}_i' \mathbf{Z}_i + \boldsymbol{\Delta}^{-1}\right) \boldsymbol{\gamma}_i + \boldsymbol{\gamma}_i \mathbf{Z}_i' \left(\mathbf{D}_i^{-1} \mathbf{W}_i - \boldsymbol{\eta}_i\right)\right\} \end{aligned}$$

which is the kernel of a multivariate normal random variable with mean  $\boldsymbol{\Omega}^{-1}\boldsymbol{\omega}$  and variance  $\boldsymbol{\Omega}^{-1}$  where  $\boldsymbol{\Omega} = \mathbf{Z}_i' \mathbf{Z}_i + \boldsymbol{\Delta}^{-1}$  and  $\boldsymbol{\omega} = \mathbf{Z}_i' \left(\mathbf{D}_i^{-1} \mathbf{W}_i - \boldsymbol{\eta}_i\right)$ .

The regression coefficients  $\boldsymbol{\eta}_i$  have posterior

$$\begin{aligned} [\boldsymbol{\eta}_i|rest] &\propto \exp\left\{-0.5[\mathbf{W}_i - \mathbf{D}_i(\mathbf{Z}_i\boldsymbol{\gamma}_i + \boldsymbol{\eta}_i)]' \mathbf{D}_i^{-2} [\mathbf{W}_i - \mathbf{D}_i(\mathbf{Z}_i\boldsymbol{\gamma}_i + \boldsymbol{\eta}_i)]\right\} \\ &\quad * \exp\left\{-0.5\boldsymbol{\eta}_i' \boldsymbol{\Psi}^{-1} \boldsymbol{\eta}_i\right\} \\ &\propto \exp\left\{-0.5\boldsymbol{\eta}_i' \left(\mathbf{D}_i \mathbf{D}_i^{-1} \mathbf{D}_i^{-1} \mathbf{D}_i + \boldsymbol{\Psi}^{-1}\right) \boldsymbol{\eta}_i + \boldsymbol{\eta}_i' \mathbf{D}_i \mathbf{D}_i^{-2} (\mathbf{W}_i - \mathbf{D}_i \mathbf{Z}_i \boldsymbol{\gamma}_i)\right\} \\ &= \exp\left\{-0.5\boldsymbol{\eta}_i' \left(\mathbf{I} + \boldsymbol{\Psi}^{-1}\right) \boldsymbol{\eta}_i + \boldsymbol{\eta}_i' \left(\mathbf{D}_i^{-1} \mathbf{W}_i - \mathbf{Z}_i \boldsymbol{\gamma}_i\right)\right\} \end{aligned}$$

which is the kernel of a multivariate normal random variable with mean  $\boldsymbol{\Omega}^{-1}\boldsymbol{\omega}$  and variance  $\boldsymbol{\Omega}^{-1}$  where  $\boldsymbol{\Omega} = \mathbf{I} + \boldsymbol{\Psi}^{-1}$  and  $\boldsymbol{\omega} = \mathbf{D}_i^{-1} \mathbf{W}_i - \mathbf{Z}_i \boldsymbol{\gamma}_i$ .

The elements of  $\boldsymbol{\Delta}$  and  $\boldsymbol{\Lambda}$  are singly updated using random walk Metropolis. The correlation parameter  $\alpha$  is sampled using independent Metropolis updates.

## 2. Additional Simulation Results.

**References.**

- [1] REICH, B. J., BONDELL, H. D. and WANG, H. J. (2010). Flexible Bayesian quantile regression for independent and clustered data. *Biostatistics* **11** 337–352.

**Supplement A: Title**

(doi: [10.1214/00-AOASXXXXSUPP](https://doi.org/10.1214/00-AOASXXXXSUPP); .pdf).

TABLE 1

Coverage probability (CP) and mean squared error (MSE) for the  $N = 100$  arm of the simulation study. We compare treating the data as independent within a subject (“Ind”), fitting with a copula (“Cop”), and the random effects model of [1] (“RBW”). Coverage and MSE were evaluated at and averaged over the quantile levels  $\{0.1, 0.3, 0.5, 0.7, 0.9\}$ . For datatype = 1, MSE values are less than depicted values by a factor of 10. Estimators whose MSEs were statistically significantly different than the copula model are indicated by \*.

| $\Delta = 0, \text{Datatype} = 1$ |                |      |                |      |                |      |                |       |                |       |                |       |
|-----------------------------------|----------------|------|----------------|------|----------------|------|----------------|-------|----------------|-------|----------------|-------|
|                                   | Coverage       |      |                |      |                |      | MSE            |       |                |       |                |       |
|                                   | $\alpha = 0.0$ |      | $\alpha = 0.5$ |      | $\alpha = 0.9$ |      | $\alpha = 0.0$ |       | $\alpha = 0.5$ |       | $\alpha = 0.9$ |       |
|                                   | X1             | X2   | X1             | X2   | X1             | X2   | X1             | X2    | X1             | X2    | X1             | X2    |
| Ind                               | 0.91           | 0.95 | 0.88           | 0.94 | 0.73           | 0.94 | 0.02           | 0.05  | 0.03           | 0.05  | 0.06           | 0.06  |
| Cop                               | 0.95           | 0.96 | 0.95           | 0.97 | 0.94           | 0.96 | 0.02           | 0.05  | 0.03           | 0.05  | 0.05           | 0.04  |
| RBW                               | 0.83           | 0.90 | 0.86           | 0.89 | 0.88           | 0.87 | 0.08*          | 0.13* | 0.10*          | 0.12* | 0.12*          | 0.11* |
| $\Delta = 0, \text{Datatype} = 2$ |                |      |                |      |                |      |                |       |                |       |                |       |
|                                   | Coverage       |      |                |      |                |      | MSE            |       |                |       |                |       |
|                                   | $\alpha = 0.0$ |      | $\alpha = 0.5$ |      | $\alpha = 0.9$ |      | $\alpha = 0.0$ |       | $\alpha = 0.5$ |       | $\alpha = 0.9$ |       |
|                                   | X1             | X2   | X1             | X2   | X1             | X2   | X1             | X2    | X1             | X2    | X1             | X2    |
| Ind                               | 0.94           | 0.97 | 0.89           | 0.94 | 0.76           | 0.95 | 0.03           | 0.06  | 0.04           | 0.06  | 0.09           | 0.06  |
| Cop                               | 0.98           | 0.98 | 0.95           | 0.98 | 0.93           | 0.97 | 0.03           | 0.06  | 0.04           | 0.06  | 0.08           | 0.06  |
| RBW                               | 0.96           | 0.98 | 0.95           | 0.96 | 0.93           | 0.95 | 0.03           | 0.06  | 0.04           | 0.06  | 0.09           | 0.06  |
| $\Delta = 3, \text{Datatype} = 1$ |                |      |                |      |                |      |                |       |                |       |                |       |
|                                   | Coverage       |      |                |      |                |      | MSE            |       |                |       |                |       |
|                                   | $\alpha = 0.0$ |      | $\alpha = 0.5$ |      | $\alpha = 0.9$ |      | $\alpha = 0.0$ |       | $\alpha = 0.5$ |       | $\alpha = 0.9$ |       |
|                                   | X1             | X2   | X1             | X2   | X1             | X2   | X1             | X2    | X1             | X2    | X1             | X2    |
| Ind                               | 0.61           | 0.76 | 0.58           | 0.78 | 0.56           | 0.72 | 0.08           | 0.09  | 0.08           | 0.09  | 0.09           | 0.10* |
| Cop                               | 0.92           | 0.91 | 0.91           | 0.90 | 0.89           | 0.91 | 0.08           | 0.07  | 0.07           | 0.07  | 0.07           | 0.06  |
| RBW                               | 0.85           | 0.70 | 0.85           | 0.69 | 0.86           | 0.67 | 0.14*          | 0.15* | 0.15*          | 0.15* | 0.16*          | 0.15* |
| $\Delta = 3, \text{Datatype} = 2$ |                |      |                |      |                |      |                |       |                |       |                |       |
|                                   | Coverage       |      |                |      |                |      | MSE            |       |                |       |                |       |
|                                   | $\alpha = 0.0$ |      | $\alpha = 0.5$ |      | $\alpha = 0.9$ |      | $\alpha = 0.0$ |       | $\alpha = 0.5$ |       | $\alpha = 0.9$ |       |
|                                   | X1             | X2   | X1             | X2   | X1             | X2   | X1             | X2    | X1             | X2    | X1             | X2    |
| Ind                               | 0.64           | 0.76 | 0.60           | 0.78 | 0.57           | 0.74 | 0.10*          | 0.12  | 0.11           | 0.13* | 0.12*          | 0.13  |
| Cop                               | 0.90           | 0.90 | 0.89           | 0.89 | 0.91           | 0.92 | 0.07           | 0.08  | 0.07           | 0.08  | 0.07           | 0.09  |
| RBW                               | 0.86           | 0.80 | 0.84           | 0.79 | 0.83           | 0.77 | 0.09           | 0.10  | 0.11           | 0.10  | 0.13*          | 0.11  |
